# Supplementary material
Source: Elsevier journal article supplement (https://www.sciencedirect.com/science/article/pii/S1885585723000427)

**SUPPLEMENTARY DATA**

**Table 1 of the supplementary data.** Standard mean deviations between the thrombus aspiration and the no thrombus aspiration groups, before and after inverse probability weighting matching

| Variables                                    | Unadjusted | Adjusted |
|----------------------------------------------|------------|----------|
| Age                                          | -27.4      | -5.6     |
| Male                                         | -0.2       | -0.3     |
| Body mass index                              | 44.2       | 4.2      |
| Hypertension                                 | 3.7        | -2.2     |
| Diabetes mellitus                            | -1.0       | -1.5     |
| Previous history of chronic kidney disease   | -3.9       | -3.1     |
| Previous history of myocardial infarction    | -7.8       | -3.3     |
| Previous history of PCI                      | 1.8        | -0.6     |
| Previous history of CABG                     | -3.0       | -2.3     |
| Previous history of stroke                   | -17.2      | -2.7     |
| Left ventricular ejection fraction under 30% | -4.4       | 1.2      |
| Peak troponin I                              | 21.5       | 5.6      |
| Creatinine                                   | -2.3       | -2.0     |
| Pre-PCI SYNTAX score tertiles                | -18.2      | -6.3     |
| Post-PCI SYNTAX score tertiles               | -33.4      | -11.8    |
| Number of involved vessels                   | -37.5      | -8.0     |
| Pre-PCI thrombus grade                       | 43.7       | -1.5     |
| Final TIMI flow                              | -11.5      | 1.7      |

CABG, coronary artery bypass graft; PCI, percutaneous coronary intervention; PCI With Taxus and Cardiac Surgery; SYNTAX, Synergy Between TIMI, Thrombolysis in Myocardial Infarction.

**Table 2 of the supplementary data.** Comparison of baseline clinical characteristics and in-hospital management according to thrombus burden

|                                         | Grade I-IV<br>(n = 207) | Grade V<br>(n = 368) | P      |
|-----------------------------------------|-------------------------|----------------------|--------|
| <b>Demographics</b>                     |                         |                      |        |
| Age, y                                  | 68.7 ± 12.4             | 64.8 ± 12.7          | < .001 |
| Male                                    | 162 (78.3)              | 272 (73.9%)          | .288   |
| Body mass index                         | 23.7 ± 3.7              | 24.0 ± 3.2           | .387   |
| <b>Cardiovascular risk factors</b>      |                         |                      |        |
| Hypertension                            | 123 (59.4)              | 183 (49.7%)          | .032   |
| Diabetes mellitus                       | 74 (35.7)               | 106 (28.8%)          | .103   |
| Current smoking                         | 66 (31.9)               | 154 (41.8%)          | .023   |
| Chronic kidney disease                  | 19 (9.2)                | 19 (5.2%)            | .092   |
| Previous myocardial infarction          | 30 (14.5)               | 38 (10.3%)           | .177   |
| Previous PCI                            | 26 (12.6)               | 39 (10.6%)           | .564   |
| Previous CABG                           | 2 (1.0)                 | 4 (1.1%)             | .999   |
| Previous history of stroke              | 22 (10.6)               | 20 (5.4%)            | .033   |
| <b>Clinical presentation</b>            |                         |                      |        |
| Type of MI                              |                         |                      | .001   |
| STEMI                                   | 141 (68.1)              | 298 (81.0%)          |        |
| NSTEMI                                  | 66 (31.9%)              | 70 (19.0%)           |        |
| Undergoing CPR                          | 41 (19.8%)              | 79 (21.5%)           | .716   |
| Mean blood pressure, mmHg               | 54.1 ± 21.2             | 55.2 ± 21.5          | .557   |
| LV ejection fraction at presentation, % | 39.6 ± 15.3             | 37.4 ± 15.6          | .142   |
| Creatinine, mg/dL                       | 1.5 ± 1.4               | 1.3 ± 0.9            | .059   |
| Lactic acid at presentation, mg/dL      | 4.9 [2.8, 8.1]          | 6.0 [3.0, 10.1]      | .069   |
| Peak troponin I, ng/mL                  | 22.8 [2.9, 62.8]        | 23.2 [2.0, 95.5]     | .940   |
| <b>In-hospital management</b>           |                         |                      |        |
| Requiring IABP                          | 62 (30.0%)              | 106 (28.8%)          | .845   |
| Requiring ECMO                          | 66 (31.9%)              | 134 (36.4%)          | .316   |
| Requiring RRT                           | 35 (16.9%)              | 61 (16.6%)           | .999   |

CABG, coronary artery bypass graft; CPR, cardiopulmonary resuscitation; ECMO, extracorporeal membrane oxygenator; IABP, intra-aortic balloon pump; LVEF, left ventricular ejection fraction; NSTEMI, non-ST-elevation myocardial infarction; PCI, percutaneous coronary intervention; RRT renal-replacement therapy; STEMI, ST-elevation myocardial infarction.

Values are expressed as median [1st interquartile, 3rd interquartile], mean ± standard

Hoon Yang, J. *et al.* *Efficacy of thrombus aspiration in cardiogenic shock complicating acute myocardial infarction and high thrombus burden [Rev Esp Cardiol 2023]*

deviation, or No. (%).

**Table 3 of the supplementary data.** Comparison of baseline angiographic and procedural characteristics according to thrombus burden

|                                     | Grade I-IV<br>(n = 207) | Grade V<br>(n = 368) | P      |
|-------------------------------------|-------------------------|----------------------|--------|
| <b>Angiographic characteristics</b> |                         |                      |        |
| <i>Multivessel disease</i>          | 172 (83.1)              | 262 (71.2)           | .002   |
| <i>Number of involved vessels</i>   |                         |                      | .003   |
| 1-vessel                            | 35 (16.9)               | 106 (28.8)           |        |
| 2-vessels                           | 94 (45.4)               | 159 (43.2)           |        |
| 3-vessels                           | 78 (37.7)               | 103 (28.0)           |        |
| <i>Infarct-related artery</i>       |                         |                      | .289   |
| Left anterior descending            | 88 (42.5)               | 150 (40.8)           |        |
| Left circumflex                     | 18 (8.7)                | 40 (10.9)            |        |
| Right coronary                      | 70 (33.8)               | 140 (38.0)           |        |
| Left main                           | 31 (15.0)               | 38 (10.3)            |        |
| <i>Site of thrombus</i>             |                         |                      | .219   |
| Left anterior descending            | 86 (41.5)               | 155 (42.1)           |        |
| Left circumflex                     | 17 (8.2)                | 36 (9.8)             |        |
| Right coronary                      | 72 (34.8)               | 141 (38.3)           |        |
| Left main                           | 32 (15.5)               | 36 (9.8)             |        |
| <i>Thrombus grade</i>               |                         |                      | < .001 |
| I                                   | 8 (3.9)                 | 0 (0.0)              |        |
| II                                  | 8 (3.9)                 | 0 (0.0)              |        |
| III                                 | 50 (24.2)               | 0 (0.0)              |        |
| IV                                  | 141 (68.1)              | 0 (0.0)              |        |
| V                                   | 0 (0.0)                 | 368 (100.0)          |        |
| <i>Preprocedural TIMI flow</i>      |                         |                      | < .001 |
| 0                                   | 0 (0.0)                 | 368 (100.0)          |        |
| 1                                   | 56 (27.0)               | 0 (0.0)              |        |
| 2                                   | 57 (27.5)               | 0 (0.0)              |        |
| 3                                   | 94 (45.4)               | 0 (0.0)              |        |
| <i>Preprocedural SYNTAX score</i>   | 20.0 [12.0, 28.0]       | 23.5 [16.0, 30.5]    | < .001 |
| <i>Classification by tertiles</i>   |                         |                      | < .001 |
| Low (< 16)                          | 89 (43.0)               | 105 (28.5)           |        |
| Intermediate (16-22)                | 45 (21.7)               | 72 (19.6)            |        |
| High (> 22)                         | 73 (35.3)               | 191 (51.9)           |        |
| <i>Postprocedural SYNTAX score</i>  | 4.0 [0.0, 11.0]         | 3.0 [0.0, 9.0]       | .034   |

Hoon Yang, J. *et al.* Efficacy of thrombus aspiration in cardiogenic shock complicating acute myocardial infarction and high thrombus burden [Rev Esp Cardiol 2023]

|                                               |                      |                      |        |
|-----------------------------------------------|----------------------|----------------------|--------|
| Classification by tertiles                    |                      |                      | .592   |
| Low (< 16)                                    | 179 (86.5)           | 328 (89.1)           |        |
| Intermediate (16-22)                          | 12 (5.8)             | 19 (5.2)             |        |
| High (> 22)                                   | 16 (7.7)             | 21 (5.7)             |        |
| <b>Procedural characteristics</b>             |                      |                      |        |
| <i>Transradial approach</i>                   | 38 (18.4)            | 63 (17.1)            | .795   |
| <i>Amount of contrast used (mL)</i>           | 163.0 [120.0, 210.0] | 157.0 [120.0, 200.0] | .710   |
| <i>Use of thrombus aspiration</i>             | 55 (26.6)            | 177 (48.1)           | < .001 |
| <i>Use of glycoprotein IIb/IIIa inhibitor</i> | 33 (15.9)            | 101 (27.4)           | .002   |
| <i>Final TIMI flow</i>                        |                      |                      | .005   |
| 0-2                                           | 21 (10.1)            | 81 (22.0)            |        |
| 3                                             | 186 (89.9)           | 287 (78.0)           |        |
| <i>No reflow</i>                              | 16 (7.7)             | 22 (6.0)             | .524   |

SYNTAX, Synergy Between PCI With Taxus and Cardiac Surgery; TIMI, Thrombolysis in Myocardial Infarction.

Values are expressed as median [first interquartile, third interquartile], mean  $\pm$  standard deviation, or No. (%).

**Table 4 of the supplementary data.** Baseline clinical characteristics and in-hospital management of patients with grade V thrombus.

|                                    | Thrombus aspiration<br>(n = 177) | No thrombus<br>aspiration<br>(n = 191) | P      |
|------------------------------------|----------------------------------|----------------------------------------|--------|
| Age (years)                        | 64.1 ± 12.4                      | 65.4 ± 12.9                            | .324   |
| Male                               | 131 (74.0)                       | 141 (73.8)                             | .999   |
| Body mass index                    | 24.7 ± 3.1                       | 23.3 ± 3.1                             | < .001 |
| Hypertension                       | 95 (53.7)                        | 88 (46.1)                              | .176   |
| Diabetes mellitus                  | 54 (30.5)                        | 52 (27.2)                              | .562   |
| Current smoking                    | 79 (44.6)                        | 75 (39.3)                              | .349   |
| Chronic kidney disease             | 12 (6.8)                         | 7 (3.7)                                | .266   |
| Previous myocardial infarction     | 18 (10.2)                        | 20 (10.5)                              | .999   |
| Previous PCI                       | 18 (10.2)                        | 21 (11.0)                              | .930   |
| Previous CABG                      | 2 (1.1)                          | 2 (1.0)                                | .999   |
| Previous history of stroke         | 7 (4.0)                          | 13 (6.8)                               | .329   |
| Type of MI                         |                                  |                                        | .169   |
| STEMI                              | 149 (84.2)                       | 149 (78.0)                             |        |
| NSTEMI                             | 28 (15.8)                        | 42 (22.0)                              |        |
| CPR                                | 33 (18.6)                        | 46 (24.1)                              | .253   |
| Mean blood pressure, mmHg          | 58.6 ± 20.6                      | 52.2 ± 21.9                            | .004   |
| LVEF at presentation, %            | 37.9 ± 16.6                      | 36.9 ± 14.7                            | .576   |
| Creatinine, mg/dL                  | 1.3 ± 1.0                        | 1.3 ± 0.9                              | .617   |
| Lactic acid at presentation, mg/dL | 5.4 [3.2, 9.3]                   | 6.7 [3.0, 10.5]                        | .543   |
| Peak troponin I, ng/mL             | 10.3 [0.5, 80.7]                 | 38.2 [5.8, 100.0]                      | .007   |
| Requiring IABP insertion           | 57 (32.2)                        | 49 (25.7)                              | .204   |
| Requiring ECMO insertion           | 68 (38.4)                        | 66 (34.6)                              | .509   |
| Requiring RRT                      | 27 (15.3)                        | 34 (17.8)                              | .606   |

CPR, cardiopulmonary resuscitation; ECMO, extracorporeal membrane oxygenator; IABP, intra-aortic balloon on pump; LVEF, left ventricular ejection fraction; NSTEMI, non-ST-elevation myocardial infarction; PCI, percutaneous coronary intervention; RRT, renal-replacement therapy; STEMI, ST-elevation myocardial infarction.

Values are expressed as median [first interquartile, third interquartile], mean ± standard deviation, or No. (%).

**Table 5 of the supplementary data.** Baseline angiographic and procedural characteristics of grade V thrombus.

|                                               | Thrombus aspiration (n = 177) | No thrombus aspiration (n = 191) | P      |
|-----------------------------------------------|-------------------------------|----------------------------------|--------|
| <i>Multivessel disease</i>                    | 116 (65.5)                    | 146 (76.4)                       | .028   |
| <i>Number of involved vessels</i>             |                               |                                  | .007   |
| 1-vessel                                      | 61 (34.5)                     | 45 (23.6)                        |        |
| 2-vessels                                     | 79 (44.6)                     | 80 (41.9)                        |        |
| 3-vessels                                     | 37 (20.9)                     | 66 (34.6)                        |        |
| <i>Infarct-related artery</i>                 |                               |                                  | .162   |
| Left anterior descending                      | 65 (36.7)                     | 85 (44.5)                        |        |
| Left circumflex                               | 16 (9.0)                      | 24 (12.6)                        |        |
| Right coronary                                | 77 (43.5)                     | 63 (33.0)                        |        |
| Left main                                     | 19 (10.7)                     | 19 (9.9)                         |        |
| <i>Site of thrombus</i>                       |                               |                                  | .208   |
| Left anterior descending                      | 68 (38.4)                     | 87 (45.5)                        |        |
| Left circumflex                               | 14 (7.9)                      | 22 (11.5)                        |        |
| Right coronary                                | 76 (42.9)                     | 65 (34.0)                        |        |
| Left main                                     | 19 (10.7)                     | 17 (8.9)                         |        |
| <i>Preprocedural SYNTAX score</i>             | 21.5 [14.0, 28.5]             | 24.5 [19.0, 32.2]                | .001   |
| <i>Classification by tertiles</i>             |                               |                                  | .006   |
| Low (<16)                                     | 63 (35.6)                     | 42 (22.0)                        |        |
| Intermediate (16-22)                          | 36 (20.3)                     | 36 (18.8)                        |        |
| High (>22)                                    | 78 (44.1)                     | 113 (59.2)                       |        |
| <i>Postprocedural SYNTAX score</i>            | 1.0 [0.0, 6.0]                | 4.0 [0.0, 10.0]                  | .005   |
| <i>Classification by tertiles</i>             |                               |                                  | .038   |
| Low (< 16)                                    | 165 (93.2)                    | 163 (85.3)                       |        |
| Intermediate (16-22)                          | 7 (4.0)                       | 12 (6.3)                         |        |
| High (> 22)                                   | 5 (2.8)                       | 16 (8.4)                         |        |
| <i>Transradial approach</i>                   | 33 (18.6)                     | 30 (15.7)                        | .543   |
| <i>Amount of contrast used (mL)</i>           | 182.1 ± 71.2                  | 144.5 ± 54.7                     | .015   |
| <i>Use of glycoprotein IIb/IIIa inhibitor</i> | 74 (41.8)                     | 27 (14.1)                        | < .001 |
| <i>Final TIMI flow</i>                        |                               |                                  | .397   |
| 0-2                                           | 43 (24.3)                     | 38 (19.9)                        |        |
| 3                                             | 134 (75.7)                    | 153 (80.1)                       |        |
| <i>No reflow</i>                              | 10 (5.6)                      | 12 (6.3)                         | .971   |

SYNTAX, Synergy Between PCI With Taxus and Cardiac Surgery; TIMI, Thrombolysis in Myocardial Infarction.

Values are expressed as median [first interquartile, third interquartile], mean ± standard deviation, or No. (%).

Hoon Yang, J. *et al.* *Efficacy of thrombus aspiration in cardiogenic shock complicating acute myocardial infarction and high thrombus burden [Rev Esp Cardiol 2023]*



**Table 6 of the supplementary data.** Subgroup analysis of 6-month clinical outcomes based on thrombus burden, after propensity score matching and inverse probability weighted adjustment<sup>1</sup>

|                                                    | Subgroup   | Propensity score matching | P    | IPW adjusted     | P    |
|----------------------------------------------------|------------|---------------------------|------|------------------|------|
| All-cause death or heart failure rehospitalization | Overall    | 0.89 (0.64-1.25)          | .501 | 0.78 (0.56-1.07) | .118 |
|                                                    | Grade V    | 0.68 (0.46-0.99)          | .046 | 0.70 (0.49-0.99) | .045 |
|                                                    | Grade I-IV | 1.22 (0.53-2.82)          | .648 | 0.96 (0.50-1.85) | .909 |
| All-cause death                                    | Overall    | 0.92 (0.65-1.30)          | .634 | 0.83 (0.60-1.14) | .250 |
|                                                    | Grade V    | 0.73 (0.50-1.09)          | .121 | 0.76 (0.53-1.10) | .152 |
|                                                    | Grade I-IV | 1.35 (0.57-3.20)          | .504 | 0.95 (0.49-1.85) | .891 |
| Cardiac death                                      | Overall    | 1.01 (0.70-1.48)          | .940 | 0.90 (0.64-1.27) | .548 |
|                                                    | Grade V    | 0.80 (0.52-1.22)          | .303 | 0.83 (0.56-1.22) | .346 |
|                                                    | Grade I-IV | 1.45 (0.55-3.81)          | .447 | 1.05 (0.52-2.13) | .892 |
| Heart failure Rehospitalization                    | Overall    | 0.68 (0.22-2.15)          | .513 | 0.38 (0.12-1.20) | .100 |
|                                                    | Grade V    | 0.40 (0.10-1.61)          | .201 | 0.35 (0.10-1.26) | .107 |
|                                                    | Grade I-IV | N/A <sup>2</sup>          |      | 0.40 (0.04-4.04) | .440 |

IPW, inverse probability weighted.

<sup>1</sup>The no thrombus aspiration group was used as reference. Variables used in multivariable analysis included use of thrombus aspiration, age over 70, diabetes mellitus, left ventricular ejection fraction < 30%, type of myocardial infarction, presence of multivessel disease, baseline creatinine value, use of mechanical support system, pre- and post-PCI SYNTAX score tertiles.

<sup>2</sup>Hazard ratio was not calculated due to low incidence of the events.

**Figure 1 of the supplementary data.** Study flow.

CABG, coronary artery bypass graft; PCI, percutaneous coronary intervention; CAG, coronary angiography.

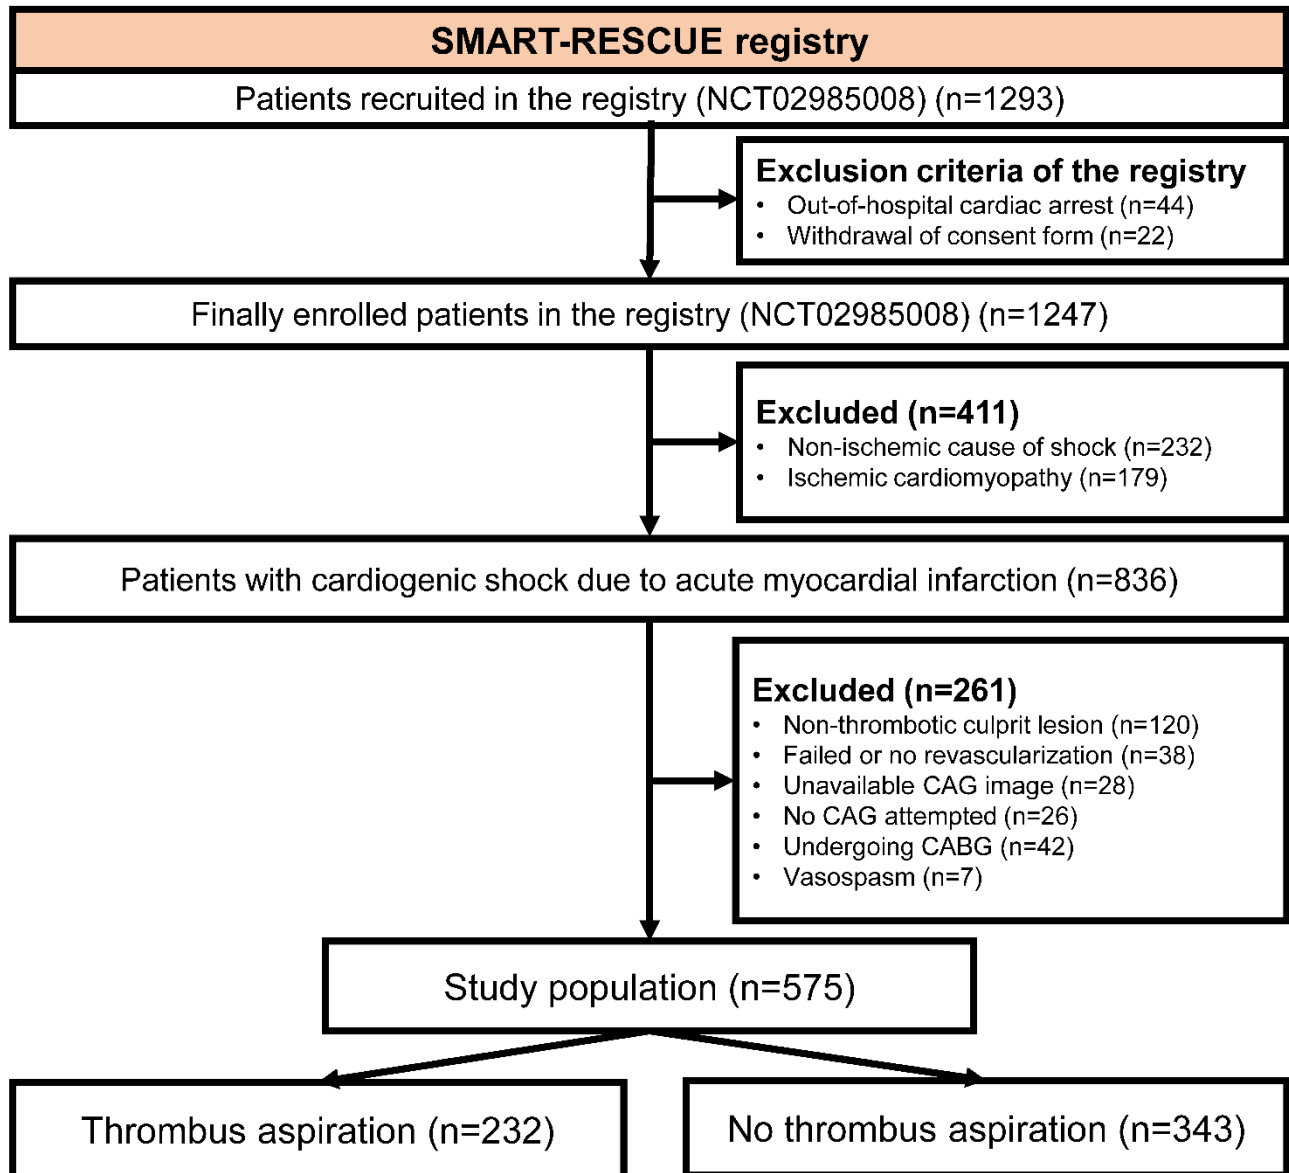

**Figure 2 of the supplementary data.** Landmark analysis of 6-month death or heart failure rehospitalization, with 30-day reference point.

In all patients, death or heart failure rehospitalization was not significantly different before the 30-day point. After the 30-day point, it became more frequent in the no TA group. The difference was significant before the 30-day point, being higher in the no TA group than the TA group, and then became nonsignificant patients with high thrombus burden **(A)**. In those with low thrombus burden, the difference between the TA and the no TA group was nonsignificant, both before and after the 30-day point **(B)**. TA, thrombus aspiration.

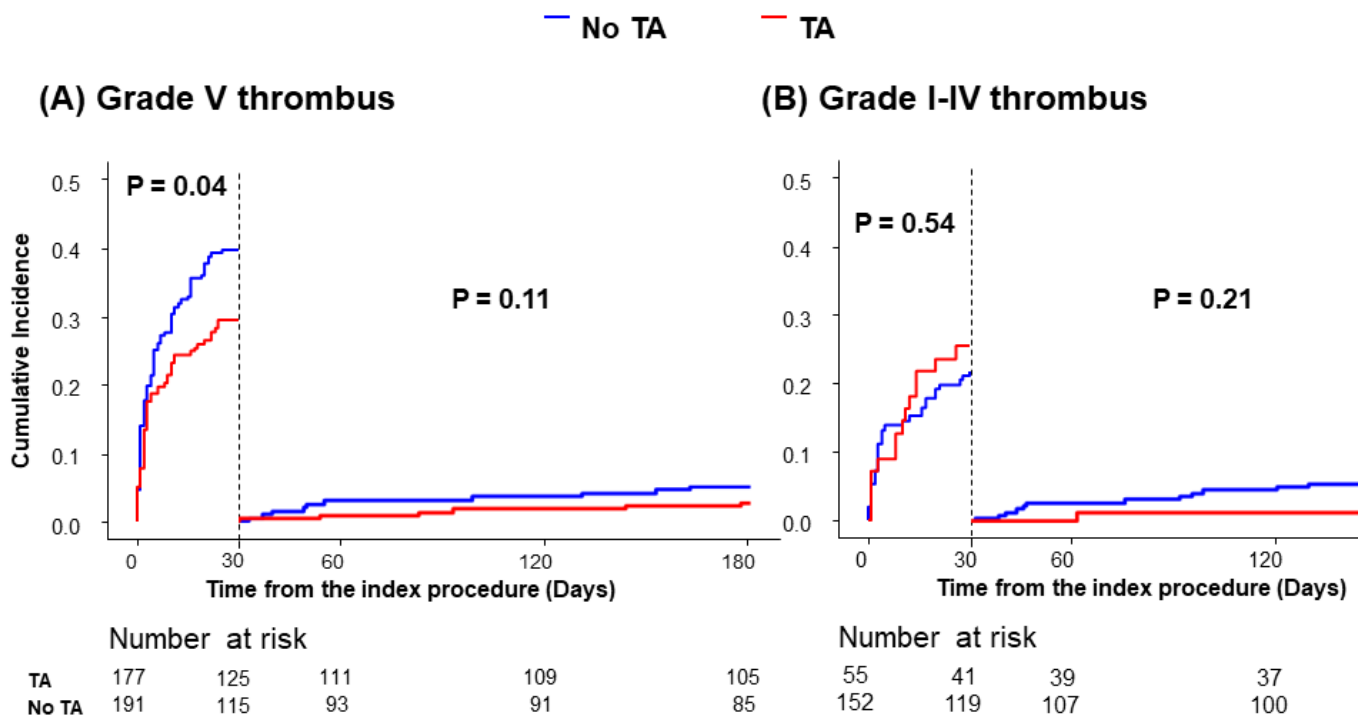

Supplement: mmc1 [file mmc1.pdf]
